# Supplementary material for: Single-cell transcriptional profiling of hearts during cardiac hypertrophy reveals the role of MAMs in cardiomyocyte subtype switching
Source: Springer Nature journal article supplement (doi:10.1038/s41598-023-35464-2), 2023-05-23
Supplement: MOESM1 [file 41598_2023_35464_MOESM1_ESM.pdf]

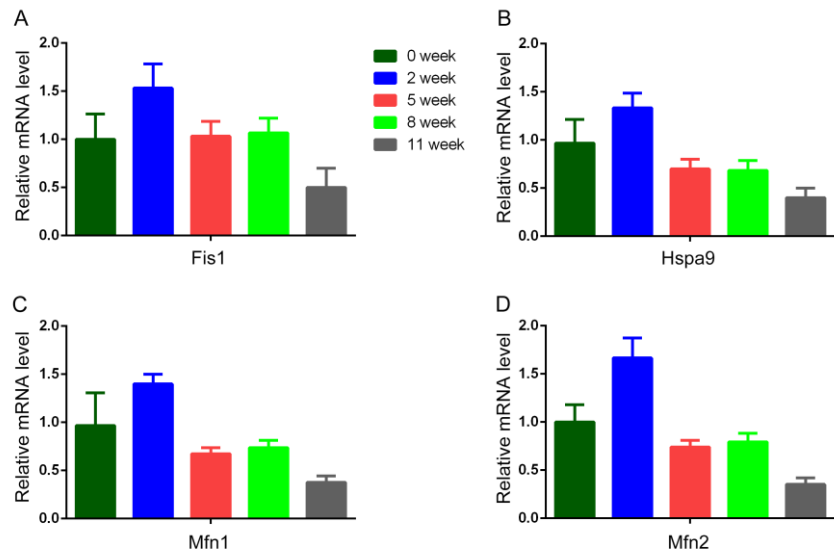

Figure S1. The relative expression level of MAM-related proteins. The level of Fis1 (A), Hspa9 (B), Mfn1 (C), Mfn2 (D) in the hearts of mice induced by TAC.
